# Supplementary material for: Explore the value of carotid ultrasound radiomics nomogram in predicting ischemic stroke risk in patients with type 2 diabetes mellitus
Source: Front Endocrinol (Lausanne). 2024 Apr 19;15:1357580. doi: 10.3389/fendo.2024.1357580 (PMC11066235; doi:10.3389/fendo.2024.1357580)
Supplement: Supplementary file 2 [file DataSheet_2.xlsx]

## Sheet: Supplementary Table ICC
index				ICC
1	diagnostics	Image-original	Mean	0.999999
2	diagnostics	Image-original	Minimum	1
3	diagnostics	Image-original	Maximum	1
4	diagnostics	Mask-original	VoxelNum	0.848238
5	diagnostics	Mask-original	VolumeNum	0.0982067
6	original	firstorder	10Percentile	0.998774
7	original	firstorder	90Percentile	0.999938
8	original	firstorder	Energy	1
9	original	firstorder	Entropy	0.932849
10	original	firstorder	InterquartileRange	0.999785
11	original	firstorder	Kurtosis	0.800093
12	original	firstorder	Maximum	0.999994
13	original	firstorder	MeanAbsoluteDeviation	0.999959
14	original	firstorder	Mean	0.999902
15	original	firstorder	Median	0.997196
16	original	firstorder	Minimum	0.999654
17	original	firstorder	Range	0.999994
18	original	firstorder	RobustMeanAbsoluteDeviation	0.999882
19	original	firstorder	RootMeanSquared	0.999961
20	original	firstorder	Skewness	0.865101
21	original	firstorder	TotalEnergy	1
22	original	firstorder	Uniformity	0.952605
23	original	firstorder	Variance	1
24	original	glcm	Autocorrelation	1
25	original	glcm	ClusterProminence	1
26	original	glcm	ClusterShade	1
27	original	glcm	ClusterTendency	1
28	original	glcm	Contrast	1
29	original	glcm	Correlation	0.939672
30	original	glcm	DifferenceAverage	0.99997
31	original	glcm	DifferenceEntropy	0.974542
32	original	glcm	DifferenceVariance	1
33	original	glcm	Id	0.970796
34	original	glcm	Idm	0.969744
35	original	glcm	Idmn	0.977949
36	original	glcm	Idn	0.977223
37	original	glcm	Imc1	0.957963
38	original	glcm	Imc2	0.973336
39	original	glcm	InverseVariance	0.961229
40	original	glcm	JointAverage	0.999775
41	original	glcm	JointEnergy	0.952536
42	original	glcm	JointEntropy	0.936121
43	original	glcm	MCC	0.954197
44	original	glcm	MaximumProbability	0.936091
45	original	glcm	SumAverage	0.999775
46	original	glcm	SumEntropy	0.929921
47	original	glcm	SumSquares	1
48	original	gldm	DependenceEntropy	0.927907
49	original	gldm	DependenceNonUniformity	0.887422
50	original	gldm	DependenceNonUniformityNormalized	0.926183
51	original	gldm	DependenceVariance	0.974803
52	original	gldm	GrayLevelNonUniformity	0.868928
53	original	gldm	GrayLevelVariance	1
54	original	gldm	HighGrayLevelEmphasis	1
55	original	gldm	LargeDependenceEmphasis	0.961016
56	original	gldm	LargeDependenceHighGrayLevelEmphasis	0.999999
57	original	gldm	LargeDependenceLowGrayLevelEmphasis	0.927624
58	original	gldm	LowGrayLevelEmphasis	0.935429
59	original	gldm	SmallDependenceEmphasis	0.981495
60	original	gldm	SmallDependenceHighGrayLevelEmphasis	1
61	original	gldm	SmallDependenceLowGrayLevelEmphasis	0.884969
62	original	glrlm	GrayLevelNonUniformity	0.83433
63	original	glrlm	GrayLevelNonUniformityNormalized	0.937083
64	original	glrlm	GrayLevelVariance	1
65	original	glrlm	HighGrayLevelRunEmphasis	1
66	original	glrlm	LongRunEmphasis	0.929807
67	original	glrlm	LongRunHighGrayLevelEmphasis	0.999997
68	original	glrlm	LongRunLowGrayLevelEmphasis	0.900042
69	original	glrlm	LowGrayLevelRunEmphasis	0.962175
70	original	glrlm	RunEntropy	0.936693
71	original	glrlm	RunLengthNonUniformity	0.804751
72	original	glrlm	RunLengthNonUniformityNormalized	0.975663
73	original	glrlm	RunPercentage	0.963569
74	original	glrlm	RunVariance	0.93897
75	original	glrlm	ShortRunEmphasis	0.966919
76	original	glrlm	ShortRunHighGrayLevelEmphasis	1
77	original	glrlm	ShortRunLowGrayLevelEmphasis	0.949421
78	original	glszm	GrayLevelNonUniformity	0.698359
79	original	glszm	GrayLevelNonUniformityNormalized	0.920281
80	original	glszm	GrayLevelVariance	1
81	original	glszm	HighGrayLevelZoneEmphasis	1
82	original	glszm	LargeAreaEmphasis	0.786422
83	original	glszm	LargeAreaHighGrayLevelEmphasis	0.68049
84	original	glszm	LargeAreaLowGrayLevelEmphasis	0.780112
85	original	glszm	LowGrayLevelZoneEmphasis	0.875631
86	original	glszm	SizeZoneNonUniformity	0.995417
87	original	glszm	SizeZoneNonUniformityNormalized	0.974164
88	original	glszm	SmallAreaEmphasis	0.973436
89	original	glszm	SmallAreaHighGrayLevelEmphasis	1
90	original	glszm	SmallAreaLowGrayLevelEmphasis	0.739732
91	original	glszm	ZoneEntropy	0.812571
92	original	glszm	ZonePercentage	0.975078
93	original	glszm	ZoneVariance	0.807756
94	original	ngtdm	Busyness	0.788869
95	original	ngtdm	Coarseness	0.63422
96	original	ngtdm	Complexity	1
97	original	ngtdm	Contrast	1
98	original	ngtdm	Strength	0.999999
